# Supplementary material for: Achieving balanced intermixed and pure crystalline phases in PDI-based non-fullerene organic solar cells via selective solvent additives
Source: Royal Society of Chemistry journal article supplement (doi:10.1039/c4cp04161e), 2014-10-24
Supplement: c4cp04161e1.pdf [file c4cp04161e1.pdf]

**Supporting information**

**Achieving Balanced Intermixed and Pure Crystalline Phases in  
PDI-based Non-fullerene Organic Solar Cells via Selective  
Solvent Additives**

Mingguang Li, Jiangang Liu, Xinxiu Cao, Ke Zhou, Qiaoqiao Zhao, Xinhong Yu, Rubo Xing,  
and Yanchun Han\*

**Table captions**

**Table S1.** Physical properties and solubility parameters calculated by different approaches for five SAs used.

**Figure captions**

**Figure S1.** UV-vis absorption spectra of EP-PDI dilute solution in chloroform and polystyrene (PS):EP-PDI (1:1) blend film spin-coated from CB solution.

**Figure S2.** Normalized Raman spectra of PTB7:EP-PDI blend films processed with different SAs.

**Figure S3.** Normalized Raman spectra of F-DTS:EP-PDI blend films processed with different SAs.

**Figure S4.** (a) UV-vis absorption spectra of two F-DTS:EP-PDI (1:2) blend films with 0.75% CN. (b) J-V curves of organic solar cells based on F-DTS:EP-PDI (1:2, w/w) with 0.75% CN. One blend film was spin-coated at 1500 rpm for 30 seconds (black line). Another blend film was spin-coated at 1500 rpm for 10 seconds and was transferred to a sealed container immediately (red line).

Table S1.

| Solvent | Boiling point [°C] | Solubility parameter[MPa <sup>1/2</sup> ] |                      | Solubility [mg mL <sup>-1</sup> ] |        |        |
|---------|--------------------|-------------------------------------------|----------------------|-----------------------------------|--------|--------|
|         |                    | Small and Hoy <sup>a)</sup>               | Fedors <sup>b)</sup> | PTB7                              | F-DTS  | EP-PDI |
| DIO     | 333                | 19.7                                      | 20.1                 | < 0.01                            | < 1    | < 1    |
| ODT     | 270                | 18.8                                      | 19.2                 | < 0.01                            | < 1    | < 1    |
| CN      | 259                | 21.9                                      | 24.4                 | > 50                              | > 50   | > 100  |
| BT      | 221                | 21.8                                      | 25.9                 | > 1                               | > 20   | > 50   |
| BF      | 173                | 22.9                                      | 24.4                 | < 0.01                            | < 0.01 | > 50   |

<sup>a)</sup> Calculated values using Small and Hoy's group contribution theory. <sup>b)</sup> Calculated values using Fedors's group contribution theory.

Figure S1.

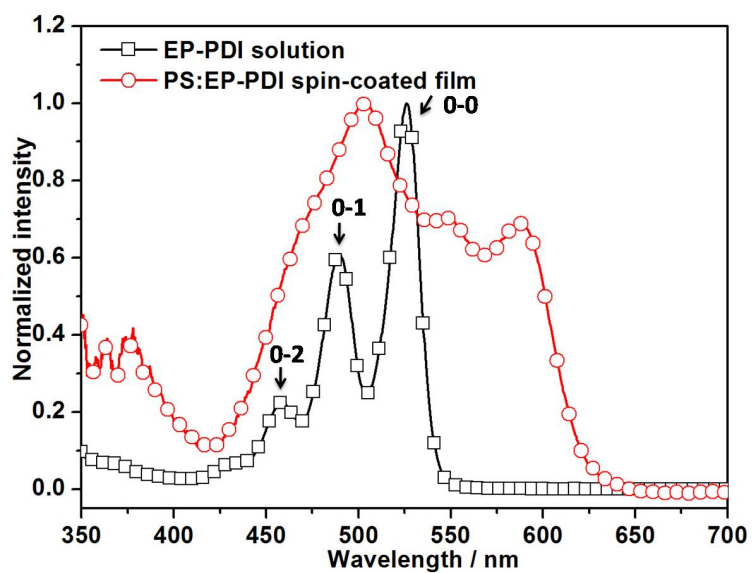

Figure S2.

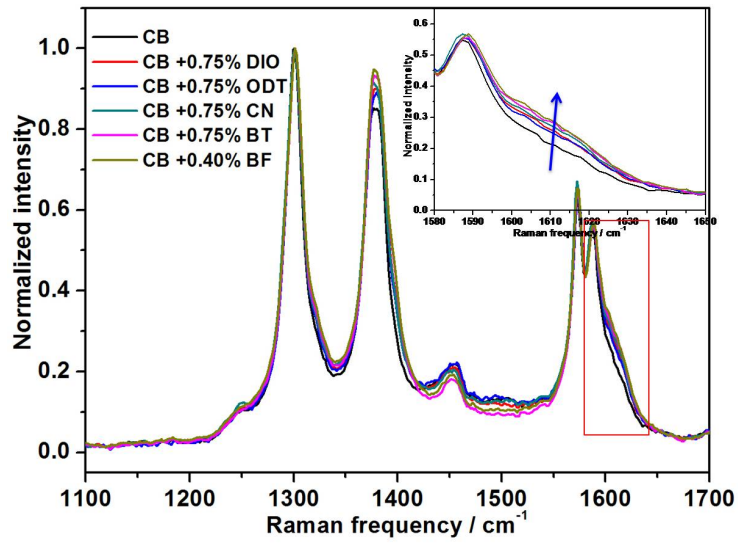

Figure S3.

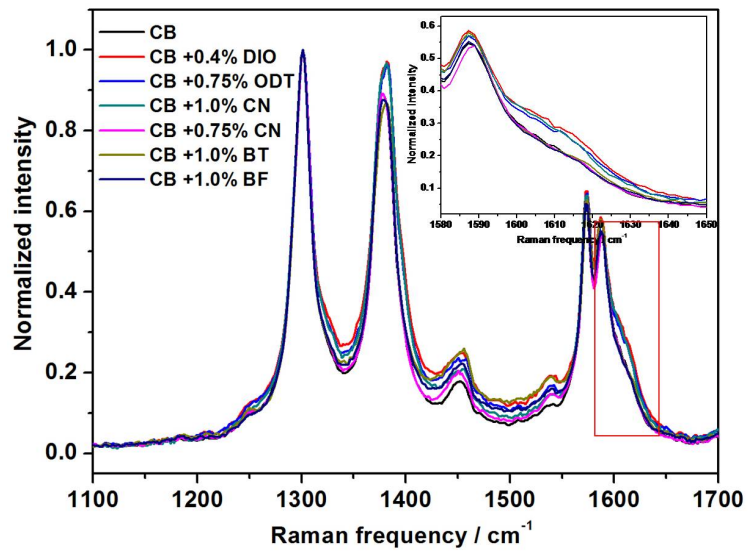

Figure S4.

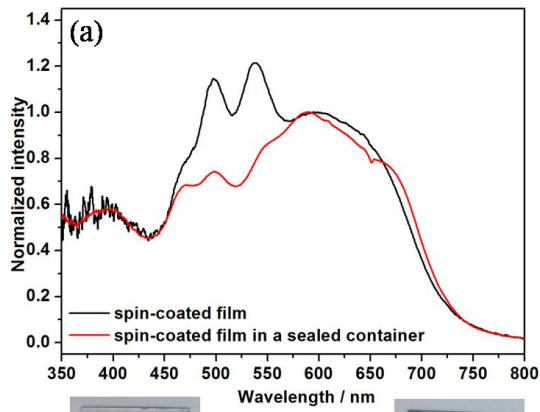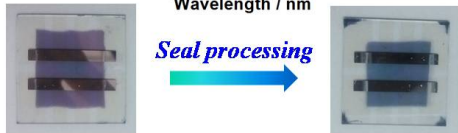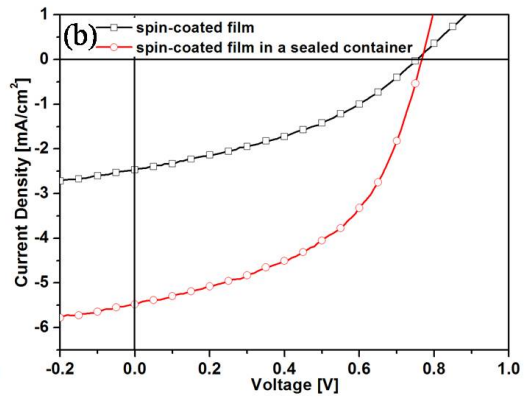

|                 | <b>Voc</b><br><b>(V)</b> | <b>Jsc</b><br><b>(<math>\text{mA}/\text{cm}^2</math>)</b> | <b>FF</b> | <b>PCE</b><br><b>(%)</b> |
|-----------------|--------------------------|-----------------------------------------------------------|-----------|--------------------------|
| Pristine film   | 0.75                     | 2.469                                                     | 0.39      | 0.727                    |
| Seal processing | 0.77                     | 5.480                                                     | 0.49      | 2.074                    |
